# Supplementary material for: Multiple Fungal Metabolites Including Mycotoxins in Naturally Infected and Fusarium-Inoculated Wheat Samples
Source: MDPI journal article supplement (doi:10.3390/microorganisms8040578), 2020-04-17

## Supplementary file 1.

**Figure 1.** The boxplot diagrams for the statistically significant differences between two treatments (inoculated and naturally-infected) for the major *Fusarium graminearum* and *F. culmorum* metabolites: deoxynivalenol (a), culmorin (b), 3-acetyldeoxynivalenol (c), 15-hydroxyculmorin (d), deoxynivalenol-3-glucoside (e) and 5-hydroxyculmorin (f). Data are presented as median, min-max and interquartile range; the  $p < 0.05$  indicates statistical significance.

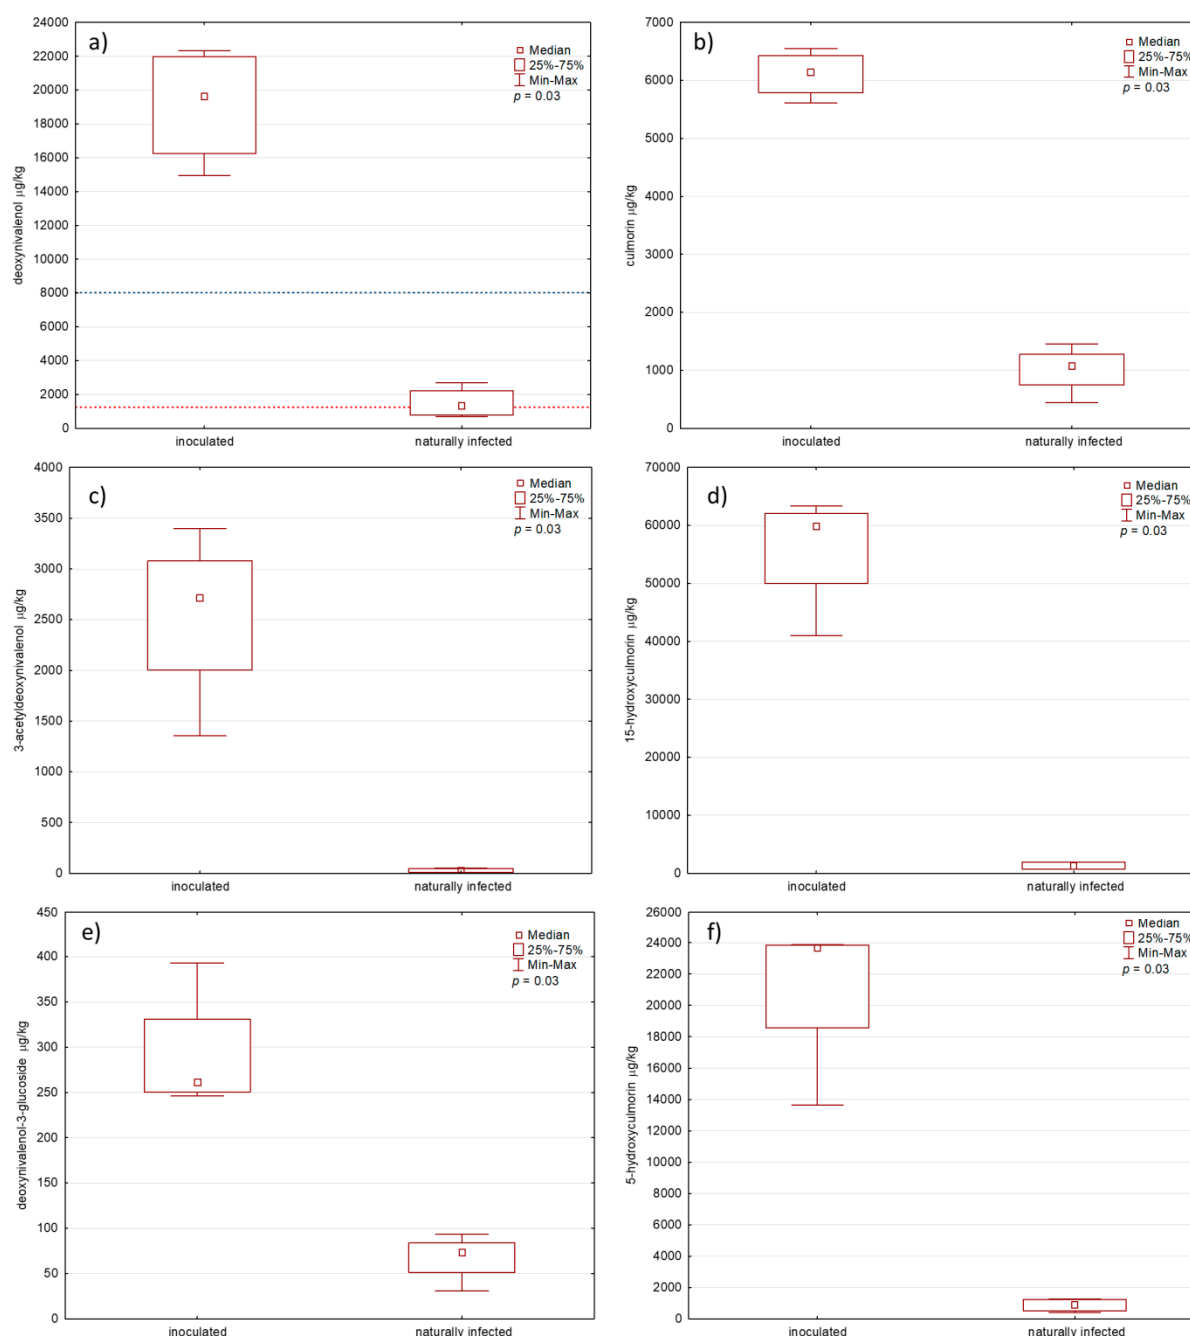

\*in the Figure 1a. red dotted line represents maximum permitted level of deoxynivalenol in wheat for human consumption (1250  $\mu\text{g/kg}$ ) according to EC 1881/2006; while the blue dotted line represents maximum recommended concentration in wheat in animal feed (8000  $\mu\text{g/kg}$ ) according to EC 576/2006.

## Supplementary file 2.

**Figure 2.** The boxplot diagrams for the statistically significant differences between two treatments (inoculated and naturally-infected) for the other detected metabolites: infectopyron (a), tentoxin (b), aurofusarin (c), rubrofusarin (d), butenolid (e), chrysogin (f) and cyclo(L-Pro-L-Val) (g). Data are presented as median, min-max and interquartile range; the  $p < 0.05$  indicates statistical significance.

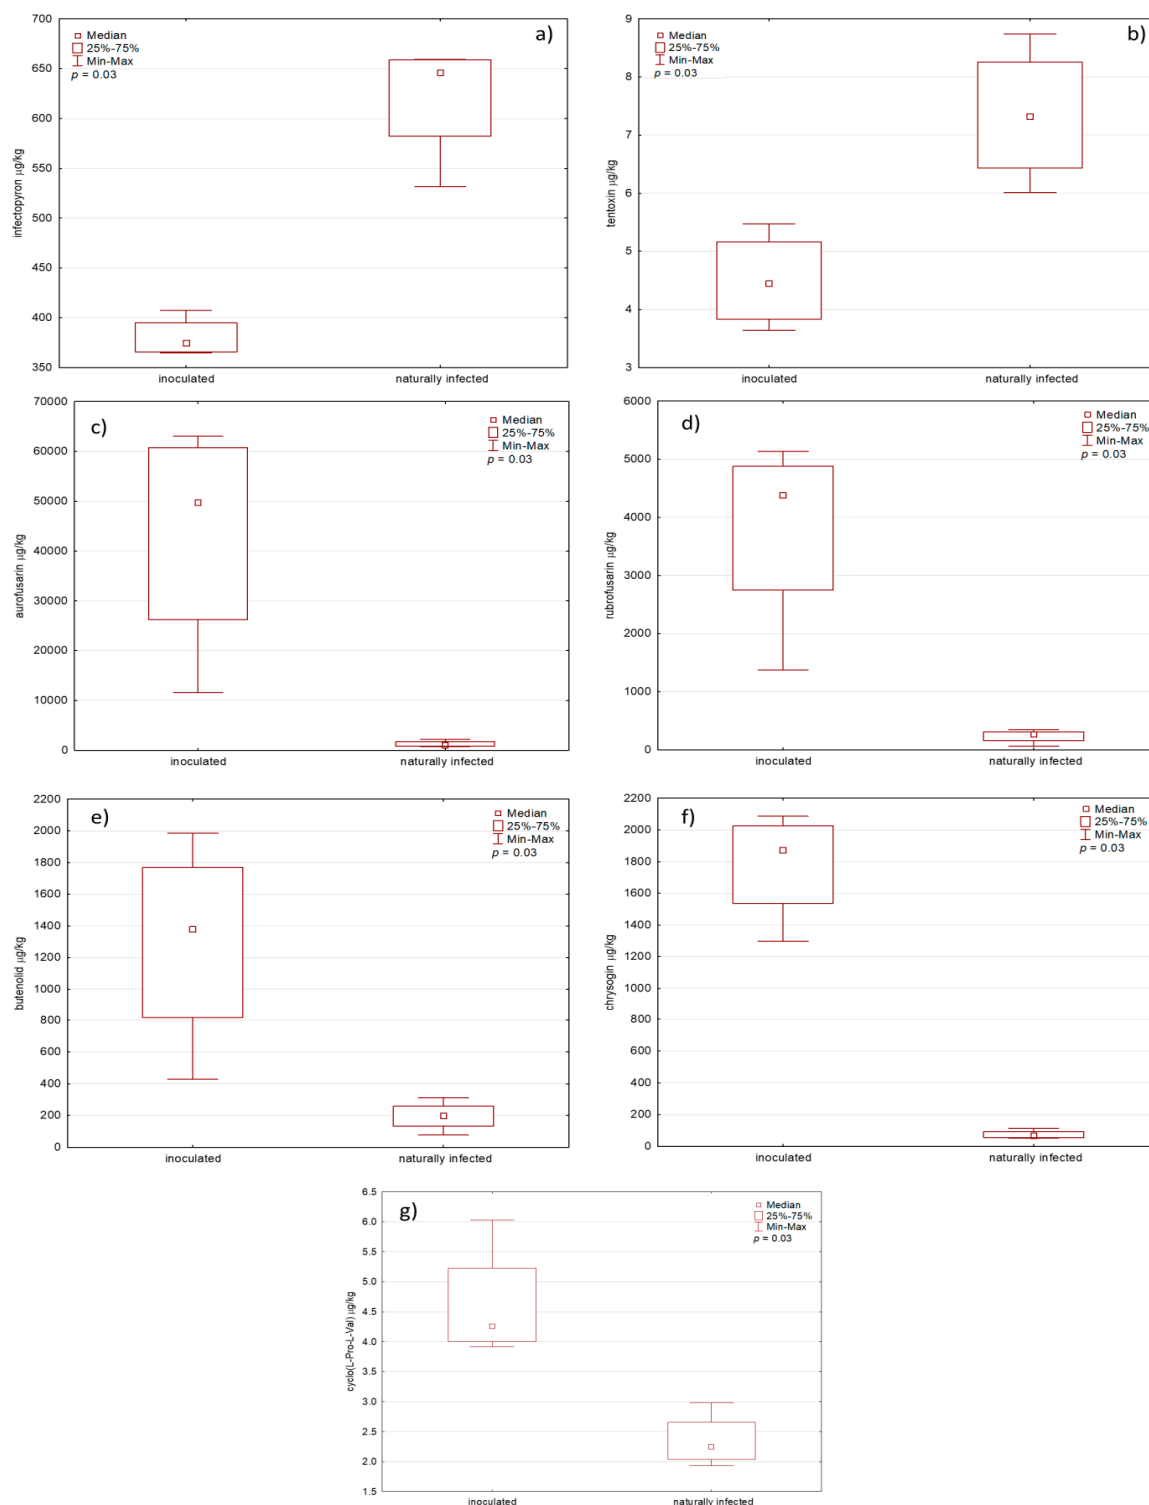

Supplement: s1 [file s1]
